# Supplementary material for: Effects of Ferrocenyl 4-(Imino)-1,4-Dihydro-quinolines on Xenopus laevis Prophase I - Arrested Oocytes: Survival and Hormonal-Induced M-Phase Entry
Source: PubMed Central journal article supplement (PMC7246863; doi:10.3390/ijms21093049), 2020-04-26
Supplement: ijms-21-03049-s001.pdf [file ijms-21-03049-s001.pdf]

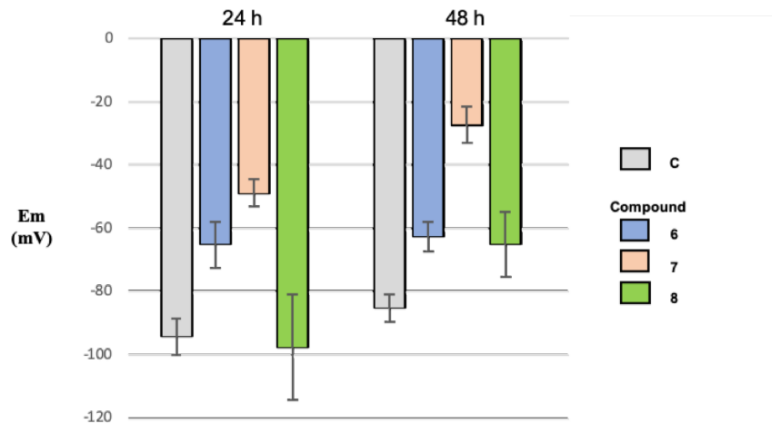

**Supplementary Figure S1.** membrane potential ( $E_m$ ) recorded from oocytes treated or not with compounds 6, 7 and 8 for 24 h, 48 h and 72 h. Records were performed using the double electrode technique and Clampex 6.0 software (Invitrogen, Saint-Aubin, France). Results are expressed as mean  $\pm$  SEM.

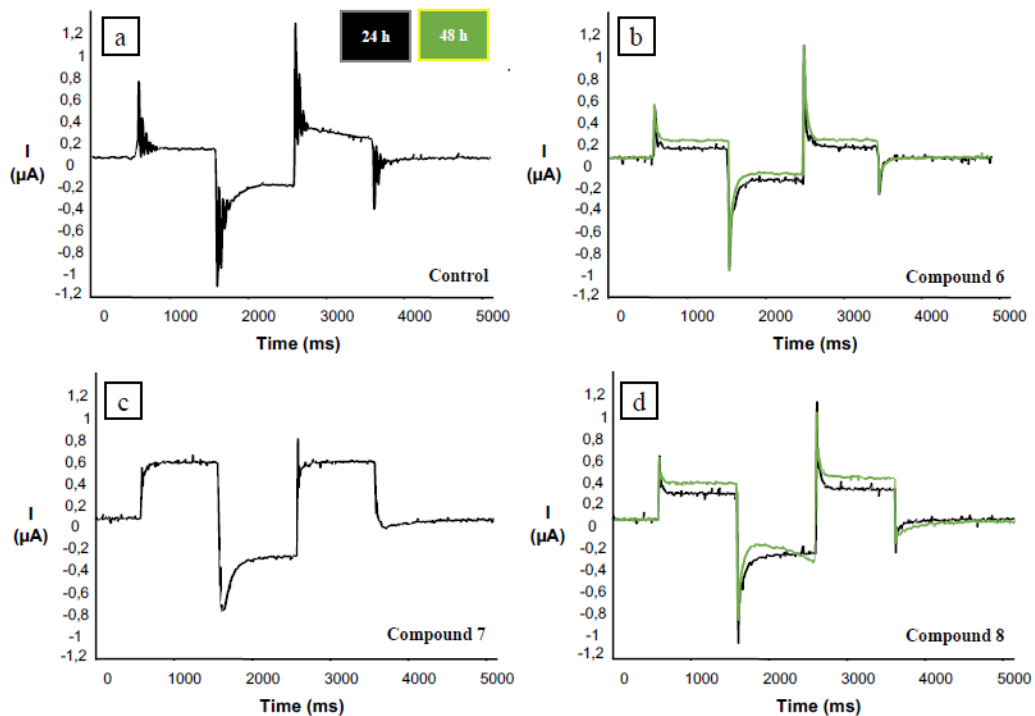

**Supplementary Figure S2.** Calcium-activated chloride currents ( $ICl$ ) in oocytes exposed or not (a) to compounds 6 (b), 7 (c), and 8 (d).  $ICl$  currents were evoked using a triple step protocol after 24 h (black), 48 h (green) and 72 h (red), Control oocyte recording is shown for 24 h (the same currents were observed at 48 h and 72 h). Oocytes treated with compound 7 dyed after 24 h. The “triple step” protocol (developed by Y. Yao, R. Y. Tsien, *J. Gen. Physiol.* **1997**, *109*, 703–715) consisted in a first depolarization from  $-40$  mV to  $+40$  mV, followed by a hyperpolarization to  $-140$  mV and a third depolarizing step at  $+40$  mV.  $ICl1-S$  is measured at the end of the first depolarisation and represent the ionic current activated by internal calcium release.  $ICl2$  obtained at the end of the second hyperpolarizing step, mirrored extracellular calcium entry.  $ICl1-T$  the third measured current is the “a tail current” activated by both intracellular calcium release and extracellular calcium entry. The recordings are representative of at least 9 different oocytes from at least 3 different females.

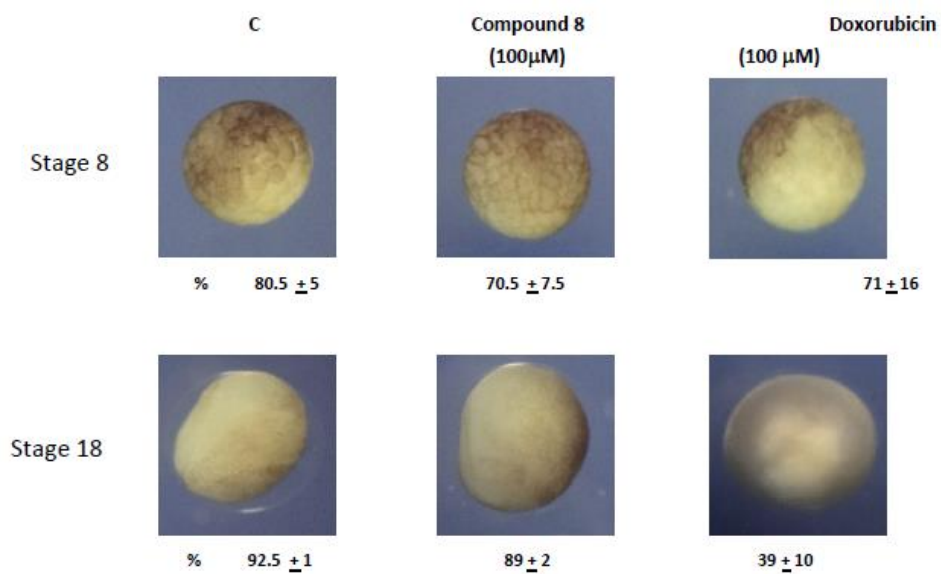

**Supplementary Figure S3.** *Xenopus* embryos were obtained by artificial fertilization and maintained in water with or without compound 8 (100  $\mu$ M) or doxorubicin (100  $\mu$ M). Embryos were staged according to Nieuwkoop and Faber table.
